# Supplementary material
Source: HighWire-hosted journal article supplement (https://bmjopen.bmj.com/content/9/9/e029074)
Supplement: inline-supplementary-material-2 [file inline-supplementary-material-2.pdf]

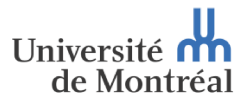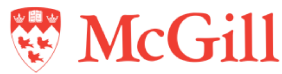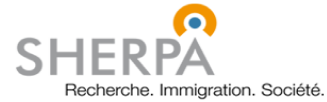

## INTERVIEW GUIDE #2

The interview questions I will ask are mainly for you (look/point towards the family “back home” who are participating via skype/phone/WhatsApp), however everyone is welcome and encouraged to participate in the discussion. Please feel free to stop the interview at any time to ask questions or if you want to stop participating in the study. Also, please remember that you are not required to answer any questions you do not wish to answer.

Do you have any questions before we begin?

I will turn on the recorder now ...

For each question ask all family members who are participating on the call to share their perspective. Throughout the interview also ask the family members in Canada if they would like to add or comment on anything.

1. Can you begin by telling me who you are and what your relationship is to your family here in Canada?
2. I would be interested to hear what your thoughts and feelings are regarding your family’s move to Canada... Can you tell me about how this experience has been for you? Is there any intention for you or other family members to come to Canada? If yes, can you tell me about this plan?
3. Can you tell me about how and how often, you maintain contact with your family here in Canada? Have you visited your family here in Canada? If yes, can you tell me about this experience (when, circumstances, feelings about it)?
4. I would now like to ask you about the support you provide to your family here in Canada-any kind of support, including emotional, financial, spiritual, practical...Can you describe to me what kinds of things you do to be helpful to them, and how? Can you give me some examples?

*Probes:*

- a. Is there anything specific that you help with back home (e.g., taking care of family members, accessing resources)?
- b. Is there anything specific that you have helped with in Canada when visiting or through contacts you have here?
- c. Are there specific things that you do for different family members (e.g., parents, children, grandparents)?
- d. Are there specific things that you do to help our family with raising and caring for their children? Can you share some examples?

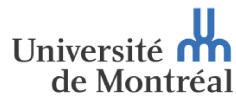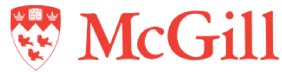

- e. Has the support or kind of support you provide, changed over time? If yes, how has it changed?
5. What has been positive about this support-giving experience? What has been more challenging?
6. Does your family provide support to you or anyone else back home (or elsewhere)? Can you give some examples? How is this experience for you and/or for your other family members?
7. Do you feel your relationship with your family has changed at all since they've moved to Canada? Can you describe how you feel it has changed?
8. Has your family's move to Canada had an impact on other family members or friends back home? If yes, how? Can you give some examples?
9. Are there things that you wish were different regarding the situation you and your family members in Canada are living right now? If yes, can you describe to me how you would like things to be different?
10. Is there anything else you would like to add or share?

Thank you so much for answering my questions. I would now like to take a few minutes to organize the next interviews.
