# Supplementary material
Source: HighWire-hosted journal article supplement (https://bmjopen.bmj.com/content/9/9/e029074)
Supplement: inline-supplementary-material-4 [file inline-supplementary-material-4.pdf]

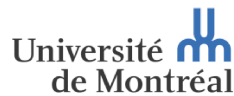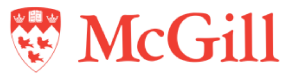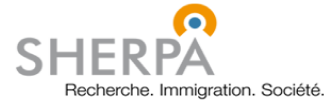

## OBSERVATION GUIDE

For each interview take notes on the environment, participants and exchanges. See below for more details (note that this is not an exhaustive list, record notes on all information that is deemed pertinent).

1. The physical environment
  - The date, time, length and location of the interview
  - Description of the location
  - Where are participants seated during the interview?
  - What communication technology was used (Skype, WhatsApp) to interview family back home
2. The participants
  - Describe the participants (sex, age range, general appearance, relationships between the participants)
  - The number of participants (in Canada and abroad)
3. The exchanges
  - Who speaks? Who speaks to who?
  - How often does each participant speak?
  - What language(s) is/are spoken
  - What is the tone of the conversation?
  - What is the non-verbal communication (facial expressions, hand gestures, emotions expressed, eye contact)?
  - What subjects are broached and by who? Which topics seem sensitive? Which topics are of most interest? Are any topics avoided?
4. Observation of « transnational exchanges » (texts, photos, email, Facebook, Instagram, letters...)
  - How do families maintain contact?
  - Describe the exchanges (the content and purpose [for pleasure, to request for support, to ask for or give advice, to send information, etc...], what is the tone of the exchange, who participated in the exchanges, what is the frequency of the exchanges)
